# Supplementary material for: Rapid-onset dystonia-parkinsonism associated with the I758S mutation of the ATP1A3 gene: a neuropathologic and neuroanatomical study of four siblings
Source: Springer Nature journal article supplement (doi:10.1007/s00401-014-1279-x), 2014-05-06
Supplement: MOESM1 [file 8404546]

Supplementary Table 1. Neuropathologic and Alzheimer changes in controls.

|                                                   | Control 1-1 | Control 1-2 | Control 1-3 | Control 2-1 | Control 2-2 | Control 2-3 | Control 2-4 | Control 2-5 | Control 3-1 | Control 3-2 | Control 3-3 | Control 3-4    | Control 4-1 | Control 4-2 | Control 4-3 | Control 4-4 |
|---------------------------------------------------|-------------|-------------|-------------|-------------|-------------|-------------|-------------|-------------|-------------|-------------|-------------|----------------|-------------|-------------|-------------|-------------|
| Gender                                            | F           | M           | F           | F           | F           | F           | M           | F           | M           | F           | F           | F              | F           | F           | M           | F           |
| Age at death                                      | 88          | 89          | 83          | 99          | 79          | 94          | 84          | 81          | 87          | 74          | 83          | 80             | 88          | 81          | 80          | 80          |
| PMH (hours)                                       | 11.7        | 15.1        | 6.1         | 10.4        | 3           | 20          | 3.2         | 17.7        | 4.7         | 5.5         | 4.3         | 16.9           | 48          | unknown     | unknown     | 13.5        |
| Brain weight (grams)                              | 920         | 1,205       | 1,310       | 1,130       | 1,174       | 990         | 1,283       | 1,130       | 1,230       | 990         | 1,124       | 1,084          | 1,300       | 1,150       | 1,268       | 1,141       |
| APOE                                              | unavailable | 34          | 34          | 34          | 33          | 34          | 34          | 33          | 33          | unavailable | 34          | 33             | 24          | 34          | 33          | 34          |
| Alzheimer disease changes (A, B, C)               | 3,2,1       | 3,2,1       | 3,2,1       | 3,2,2       | 3,2,2       | 3,2,2       | 3,2,2       | 3,2,2       | 3,2,3       | 3,2,3       | 3,2,3       | unclassifiable | 3,2,2       | 3,2,2       | 3,2,2       | 3,2,2       |
| Superior frontal gyrus & anterior cingulate gyrus | 1           | 2           | 1           | 2           | 1           | 2           | 2           | 1           | 2           | 2           | 2           | 1              | 2           | 2           | 1           | 1           |
| Caudate nucleus & putamen                         | 1           | 1           | 1           | 2           | 1           | 2           | 1           | 0           | 1           | 1           | 1           | 2              | 2           | 2           | 0           | 1           |
| Globus pallidus                                   | 1           | 1           | 1           | 1           | 1           | 2           | 2           | 2           | 1           | 1           | 1           | 1              | 2           | 2           | 1           | 1           |
| Substantia innominata                             | 1           | 1           | 1           | 1           | 2           | 2           | 2           | 1           | 3           | 1           | 2           | 2              | 3           | 2           | 0           | 1           |
| Amygdala                                          | 3           | 2           | 1           | 2           | 1           | 3           | 1           | 1           | 3           | 2           | 2           | 2              | 2           | 3           | 0           | 2           |
| Superior and middle temporal gyrus                | 1           | 2           | 1           | 1           | 1           | 2           | 2           | 2           | 2           | 2           | 2           | 2              | 2           | 2           | 0           | 2           |
| Subthalamic nucleus                               | 1           | 2           | 2           | 2           | 1           | 1           | 1           | 0           | 1           | 1           | 1           | 0              | 1           | 2           | 0           | 2           |
| Thalamus                                          | 1           | 2           | 2           | 2           | 1           | 1           | 1           | 0           | 1           | 1           | 1           | 0              | 1           | 2           | 0           | 2           |
| Hippocampus, CA1 - CA4                            | 2           | 2           | 2           | 2           | 1           | 1           | 2           | 2           | 1           | 1           | 1           | 1              | 2           | 2           | 0           | 2           |
| Hippocampus, Molecular layer                      | 0           | 2           | 1           | 1           | 0           | 0           | 0           | 0           | 0           | 0           | 0           | 0              | 0           | 0           | 0           | 0           |
| Hippocampus, Dentate Gyrus                        | 0           | 1           | 0           | 0           | 1           | 2           | 1           | 0           | 0           | 0           | 0           | 0              | 1           | 1           | 0           | 2           |
| Subiculum                                         | 3           | 3           | 0           | 1           | 1           | 3           | 2           | 1           | 3           | 2           | 2           | 1              | 2           | 2           | 0           | 2           |
| Entorhinal Cortex                                 | 3           | 2           | 1           | 2           | 1           | 3           | 2           | 1           | 3           | 2           | 2           | 2              | 2           | 2           | 0           | 3           |
| Superior parietal lobule                          | 2           | 2           | 1           | 2           | 1           | 2           | 3           | 1           | 2           | 2           | 2           | 2              | 2           | 2           | 0           | 1           |
| Calcarine cortex                                  | 1           | 2           | 1           | 2           | 1           | 1           | 2           | 1           | 2           | 2           | 2           | 1              | 1           | 2           | 0           | 1           |
| Cerebellum, molecular layer                       | 1           | 2           | 1           | 1           | 1           | 2           | 0           | 0           | 1           | 0           | 0           | 2              | 0           | 2           | 0           | 1           |
| Cerebellum, Purkinje cell layer                   | 0           | 2           | 1           | 2           | 1           | 3           | 2           | 1           | 2           | 1           | 2           | 2              | 2           | 2           | 0           | 2           |
| Cerebellum, granule cell layer                    | 0           | 2           | 1           | 2           | 1           | 2           | 0           | 0           | 1           | 0           | 0           | 2              | 0           | 2           | 0           | 2           |
| Cerebellum, dentate nucleus                       | 2           | 0           | 1           | 2           | 1           | 1           | 1           | 1           | 0           | 1           | 2           | 1              | 1           | 2           | 0           | 2           |
| Cerebellum, white matter                          | 0           | 2           | 0           | 2           | 0           | 0           | 0           | 0           | 0           | 0           | 0           | 0              | 0           | 0           | 0           | 0           |
| Midbrain, superior colliculus                     | 0           | 2           | 0           | 0           | 0           | 0           | 0           | 0           | 0           | 0           | 1           | 0              | 0           | 0           | 0           | 0           |
| Midbrain, periaqueductal grey                     | 0           | 3           | 0           | 0           | 0           | 0           | 0           | 0           | 0           | 0           | 0           | 0              | 0           | 0           | 0           | 0           |
| Midbrain, substantia nigra                        | 2           | 1           | 0           | 0           | 1           | 1           | 2           | 2           | 1           | 2           | 2           | 0              | 1           | 1           | 0           | 1           |
| Midbrain, red nucleus                             | 0           | 0           | 1           | 1           | 0           | 0           | 0           | 0           | 0           | 0           | 0           | 0              | 0           | 0           | 0           | 0           |
| Midbrain, locus coeruleus                         | 1           | 1           | 0           | 0           | 1           | 2           | 1           | 1           | 0           | 2           | 1           | 2              | 2           | 3           | 0           | 2           |
| Pons, pontine nuclei                              | 0           | 0           | 2           | 2           | 0           | 0           | 1           | 0           | 0           | 0           | 0           | 0              | 0           | 0           | 0           | 0           |
| Pons, reticular formation                         | 0           | 0           | 0           | 0           | 0           | 0           | 0           | 0           | 0           | 0           | 0           | 0              | 0           | 0           | 0           | 0           |
| Medulla, dorsal motor nucleus of the vagus nerve  | 0           | 0           | 0           | 0           | 0           | 1           | 1           | 0           | 0           | 0           | 2           | 2              | 2           | 3           | 0           | 2           |
| Medulla, hypoglossal nucleus                      | 0           | 0           | 1           | 2           | 0           | 1           | 1           | 0           | 0           | 0           | 2           | 2              | 2           | 3           | 0           | 2           |
| Medulla, inferior olivary nucleus                 | 1           | 0           | 0           | 2           | 1           | 1           | 2           | 2           | 0           | 1           | 2           | 2              | 1           | 2           | 0           | 2           |
| Middle frontal gyrus                              | 1           | 2           | 1           | 2           | 1           | 2           | 2           | 1           | 2           | n/a         | n/a         | 1              | 2           | 2           | 0           | 1           |

Areas of neuronal loss and gliosis AND no associated AD related pathology (neuritic plaques, diffuse plaques, neurofibrillary tangles, neuropil threads, tau-ir neurons)  
 Plaques (Neuritic and Diffuse)  
 Plaques (Neuritic and Diffuse) & Tangles  
 Tangles, only

Degree of neuron loss and gliosis in brain regions: none = 0, mild = 1, moderate = 2, severe = 3

Article title: Rapid-onset dystonia-parkinsonism associated with the I758S mutation of the ATP1A3 gene: A neuropathologic and neuroanatomical study of four siblings

Journal name: Acta Neuropathologica

Authors: Adrian L. Oblak, Ph.D., Matthew C. Hagen, M.D., Ph.D., Kathleen J Swadner, Ph.D., Ibtisam Haq, M.D., Christopher T. Whitlow, M.D., Ph.D., Joseph A. Maldjian, M.D., Francine Epperson, Jared F. Cook, M.A., Mark Stacy, M.D., Jill R. Murrell, Ph.D., Laurie J Ozelius, Ph.D., Allison Brashear, M.D., Bernardino Ghetti, M.D.

Corresponding author:  
 Bernardino Ghetti, MD  
 Indiana University School of Medicine  
 Department of Pathology and Laboratory Medicine  
[bghetti@iupui.edu](mailto:bghetti@iupui.edu)
