# Supplementary material for: Rapid-onset dystonia-parkinsonism associated with the I758S mutation of the ATP1A3 gene: a neuropathologic and neuroanatomical study of four siblings
Source: Springer Nature journal article supplement (doi:10.1007/s00401-014-1279-x), 2014-05-06
Supplement: MOESM2 [file 8404546]

Supplementary Table 2. Psychiatric Status of each subject.

| Case | Age at visit | Gender | Age at onset of motor symptoms | Self-Report         | DSM IV diagnosis                                                          | Specific psychotic symptoms                                                     |
|------|--------------|--------|--------------------------------|---------------------|---------------------------------------------------------------------------|---------------------------------------------------------------------------------|
| 1    | 80           | F      | 28                             | Depression, Anxiety | N/A                                                                       | N/A                                                                             |
| 2    | 81           | F      | 25                             | Depression, Anxiety | N/A                                                                       | N/A                                                                             |
| 3    | 84           | F      | N/A                            | Depression          | None                                                                      | N/A                                                                             |
| 4    | 83           | M      | 45                             | Depression, Anxiety | Psychotic disorder NOS; panic disorder without agoraphobia; alcohol abuse | Paranoid delusions, thought insertion, thought broadcasting, thought withdrawal |

N/A = Not Applicable, NOS = Not otherwise specified

Article title: Rapid-onset dystonia-parkinsonism associated with the I758S mutation of the ATP1A3 gene: A neuropathologic and neuroanatomical study of four siblings

Journal name: Acta Neuropathologica

Authors: Adrian L. Oblak, Ph.D., Matthew C. Hagen, M.D., Ph.D., Kathleen J Sweadner, Ph.D.,

Ihtsham Haq, M.D., Christopher T. Whitlow, M.D., Ph.D., Joseph A. Maldjian, M.D., Francine Epperson, Jared F. Cook, M.A., Mark Stacy, M.D., Jill R. Murrell, Ph.D., Laurie J Ozelius, Ph.D., Allison Brashear, M.D., Bernardino Ghetti, M.D.

Corresponding author:

Bernardino Ghetti, MD

Indiana University School of Medicine

Department of Pathology and Laboratory Medicine

[bghetti@iupui.edu](mailto:bghetti@iupui.edu)
