# Supplementary material for: Rapid-onset dystonia-parkinsonism associated with the I758S mutation of the ATP1A3 gene: a neuropathologic and neuroanatomical study of four siblings
Source: Springer Nature journal article supplement (doi:10.1007/s00401-014-1279-x), 2014-05-06
Supplement: MOESM3 [file 8404546]

Supplementary Table 3. Cognitive Status

| <b>Test</b>                                | <b>Case 3</b>                                      | <b>Case 4</b>                            |
|--------------------------------------------|----------------------------------------------------|------------------------------------------|
| <b>IQ Estimate (1)</b>                     | SS / Pr                                            | SS / Pr                                  |
| Raven's Progressive Matrices               | 75 / 5 <sup>th</sup><br>(Borderline)               | 78 / 7 <sup>th</sup><br>(Borderline)     |
| <b>Memory and Learning (2)</b>             | ScS / Pr                                           | ScS / Pr                                 |
| WRAML2 Picture Memory                      | --                                                 | 8 / 25 <sup>th</sup><br>(Average)        |
| WRAML2 Picture Memory Delayed Recognition  | --                                                 | 5 / 5 <sup>th</sup><br>(Borderline)      |
| WRAML2 Design Memory                       | 6 / 9 <sup>th</sup><br>(Borderline)                | 5 / 5 <sup>th</sup><br>(Borderline)      |
| WRAML2 Design Memory Delayed Recognition   | 6 / 9 <sup>th</sup><br>(Borderline)                | 9 / 37 <sup>th</sup><br>(Average)        |
| WRAML2 Verbal Learning                     | 9 / 37 <sup>th</sup><br>(Average)                  | 8 / 25 <sup>th</sup><br>(Low Average)    |
| WRAML2 Verbal Learning Delayed Recall      | 7 / 16 <sup>th</sup><br>(Low Average)              | 8 / 25 <sup>th</sup><br>(Low Average)    |
| WRAML2 Verbal Learning Delayed Recognition | 10 / 50 <sup>th</sup><br>(Average)                 | 6 / 9 <sup>th</sup><br>(Below Average)   |
| <b>Psychomotor Speed and Attention</b>     | T or Z score / Pr                                  | T or Z score / Pr                        |
| Trail Making Test Part A (3) *             | 31 / 3 <sup>rd</sup><br>(Mild-Moderate Impairment) | 40 / 16 <sup>th</sup><br>(Below Average) |
| SDMT-Written (4)                           | --                                                 | -3.00 / 1 <sup>st</sup><br>(Very Low)    |

|                                      |                                           |                                               |
|--------------------------------------|-------------------------------------------|-----------------------------------------------|
| SDMT-Oral (4)                        | --                                        | -2.70 / 1 <sup>st</sup><br>(Very Low)         |
| <b>Executive Functioning</b>         | T score / Pr                              | T score / Pr                                  |
| Trail Making Test Part B (3) *       | --                                        | 35 / 7 <sup>th</sup><br>(Mild Impairment)     |
| COWA Semantic Verbal Fluency (5) *   | 35 / 7 <sup>th</sup><br>(Mild Impairment) | 28 / 2 <sup>nd</sup><br>(Moderate Impairment) |
| COWA Linguistic Verbal Fluency (5) * | 37 / 9 <sup>th</sup><br>(Mild Impairment) | 28 / 2 <sup>nd</sup><br>(Moderate Impairment) |

Pr = Percentile rank

SS = Standard Score (mean = 100, standard deviation = 15)

ScS = Scaled Score (mean = 10, standard deviation = 3)

T score (mean = 50, standard deviation = 10)

Z score (mean = 0, standard deviation = 1)

WRAML2 = Wide Range Assessment of Memory and Learning, Second Edition

SDMT = Symbol Digit Modalities Test

COWA = Controlled Oral Word Association

\* T scores derived from demographically adjusted neuropsychological normative data (6)

Article title: Rapid-onset dystonia-parkinsonism associated with the I758S mutation of the ATP1A3 gene: A neuropathologic and neuroanatomical study of four siblings

Journal name: Acta Neuropathologica

Authors: Adrian L. Oblak, Ph.D., Matthew C. Hagen, M.D., Ph.D., Kathleen J Sweadner, Ph.D., Ihtsham Haq, M.D., Christopher T. Whitlow, M.D., Ph.D., Joseph A. Maldjian, M.D., Francine Epperson, Jared F. Cook, M.A., Mark Stacy, M.D., Jill R. Murrell, Ph.D., Laurie J Ozelius, Ph.D., Allison Brashear, M.D., Bernardino Ghetti, M.D.

Corresponding author:

Bernardino Ghetti, MD

Indiana University School of Medicine

Department of Pathology and Laboratory Medicine

[bghetti@iupui.edu](mailto:bghetti@iupui.edu)

## Reference List

- (1) Raven JC. Raven's Progressive Matrices and Coloured Progressive Matrices with Research Supplement. (2000) Harcourt Assessment, San Antonio, USA
- (2) Sheslow D, Adams W. Wide Range Assessment of Memory and Learning, Second Edition. ed. (2007) Wide Range Inc., Florida, USA
- (3) Washington DC- Adjutant General's Office WD. Army Individual Test Battery. Manual of directions and scoring. (1944)
- (4) Smith A. Symbol Digit Modalities Test: Manual. (2007) Western Psychological Services, Los Angeles, USA
- (5) Spreen O, Strauss E. A Compendium of Neuropsychological Tests. (1998) Oxford University Press, New York, USA
- (6) Heaton RK, Miller W, Taylor MJ, Grant I. (2004) Revised Comprehensive Norms for an Expanded Halstead-Reitan Battery: Demographically Adjusted Neuropsychological Norms for African American and Caucasian Adults. Psychological Assessment Resources, Inc. USA
